# Supplementary material for: Study of common hypertriglyceridaemia genetic variants and subclinical atherosclerosis in a group of women with SLE and a control group
Source: PubMed Central journal article supplement — Lupus Sci Med. 2022 Aug 23;9(1):e000774. doi: 10.1136/lupus-2022-000774 (PMC9403106; doi:10.1136/lupus-2022-000774), 2022-08-23
Supplement: lupus-2022-000774supp001.pdf [file lupus-2022-000774supp001.pdf]

## Supplementary Material

**Table S1:** Statistical analysis of the clinical and analytical variables of the women of the control group without and with ultrasound (US).

| Variable                                  | Control without US<br>(n= 15) | Control with US<br>(n= 58) | <i>p</i>     |
|-------------------------------------------|-------------------------------|----------------------------|--------------|
| Age (years)                               | 54.5 (12.6)                   | 51.4 (8.6)                 | 0.266        |
| Statins                                   | 3 (20.0 %)                    | 5 (8.6 %)                  | 0.348        |
| Hypertension                              | 2 (13.3 %)                    | 2 (3.4 %)                  | 0.185        |
| Diabetes mellitus                         | 0 (0.0 %)                     | 3 (5.2 %)                  | > 0.999      |
| Dyslipidemia                              | 5 (33.3 %)                    | 20 (34.5 %)                | 0.933        |
| Body mass index (kg/m <sup>2</sup> )      | 23.5 (4.5)                    | 26.4 (4.0)                 | <b>0.018</b> |
| Weight (kg)                               | 61.0 (10.8)                   | 68.8 (12.0)                | <b>0.026</b> |
| GFR CKD-EPI (mL/min/1.73 m <sup>2</sup> ) | 89.5 (87 to 90)               | 90 (90 to 90)              | 0.099        |
| Glucose (mmol/L)                          | 5.0 (0.6)                     | 5.3 (1.6)                  | 0.586        |
| T&G index                                 | 4.40 (4.24 to 4.54)           | 4.37 (4.25 to 4.56)        | 0.943        |
| Insulin resistance                        | 2 (14.3 %)                    | 8 (13.8 %)                 | < 0.999      |
| Total cholesterol (mmol/L)                | 4.7 (0.8)                     | 5.4 (1.0)                  | 0.077        |
| HDL-C (mmol/L)                            | 1.6 (0.7)                     | 1.8 (0.5)                  | 0.290        |
| LDL-C (mmol/L)                            | 2.8 (0.8)                     | 3.1 (0.8)                  | 0.194        |
| Apolipoprotein A (g/L)                    | 1.6 (1.4 to 1.7)              | 1.7 (1.5 to 1.9)           | 0.099        |
| Apolipoprotein B (g/L)                    | 0.9 (0.8 to 1.1)              | 1.1 (0.9 to 1.2)           | 0.183        |
| Triglycerides (mmol/L)                    | 0.9 (0.6 to 1.1)              | 0.8 (0.6 to 1.1)           | 0.989        |
| Non-HDL-C (mmol/L)                        | 3.2 (0.8)                     | 3.5 (0.9)                  | 0.213        |
| Lipoprotein (a) (g/L)                     | 0.5 (0.1 to 1.7)              | 0.2 (0.6 to 0.5)           | 0.099        |
| Albumin/creatinine (g/mol)                | 0.6 (0.1 to 0.8)              | 0.0 (0.0 to 0.4)           | <b>0.007</b> |
| APOE E2/E3-4                              | 0 (0.0 %)                     | 8 (14.0 %)                 | 0.191        |
| APOE E4/E2-3                              | 4 (26.7 %)                    | 9 (15.8 %)                 | 0.450        |
| ZPR1 (c.*724C>G)                          |                               |                            |              |
| CC                                        | 9 (60.0 %)                    | 41 (70.7 %)                | 0.427        |
| CG                                        | 6 (40.0 %)                    | 17 (29.3 %)                |              |
| APOA5 (c.56C>G)                           |                               |                            |              |
| CC                                        | 12 (80.0 %)                   | 54 (93.1 %)                | 0.124        |
| CG                                        | 3 (20.0 %)                    | 4 (6.9 %)                  |              |
| GCKR (c.1337C>T)                          |                               |                            |              |
| CC                                        | 3 (20.0 %)                    | 17 (29.3 %)                | 0.694        |
| CT                                        | 9 (60.0 %)                    | 28 (48.3 %)                |              |
| TT                                        | 3 (20.0 %)                    | 13 (22.4 %)                |              |
| Family history of premature CAD           | 0 (0.0 %)                     | 6 (10.3 %)                 | 0.335        |
| Family history of non-premature CAD       | 3 (20.0 %)                    | 10 (17.2 %)                | 0.723        |
| Family history of premature stroke        | 0 (0.0 %)                     | 5 (8.6 %)                  | 0.576        |
| Family history of non-premature stroke    | 5 (33.3 %)                    | 11 (19.0 %)                | 0.295        |
| Active smoking                            | 5 (33.3 %)                    | 13 (22.4 %)                | 0.502        |

| Variable                               | Control without US<br>(n= 15) | Control with US<br>(n= 58) | <i>p</i>     |
|----------------------------------------|-------------------------------|----------------------------|--------------|
| Ex-smoker >6 months                    | 0 (0.0 %)                     | 12 (20.7 %)                | 0.061        |
| Waist circumference (cm)               | 90.8 (13.4)                   | 88.9 (13.2)                | 0.630        |
| Dietary questionnaire (score)          | 10.7 (7 to 14)                | 11.7 (5 to 14)             | 0.086        |
| Physical activity (puntos)             | 1.8 (1.1)                     | 1.7 (1.2)                  | 0.862        |
| Menopause                              | 9 (60.0 %)                    | 35 (60.3 %)                | 0.981        |
| Menopause < 40 years                   | 0 (0.0 %)                     | 1 (1.7 %)                  | > 0.999      |
| Menarche (years)                       | 12.1 (1.8)                    | 12.8 (1.7)                 | 0.199        |
| Pregnancies (number)                   | 1 (0 to 3)                    | 2 (1 to 3)                 | 0.197        |
| Miscarriages (number)                  | 0 (0 to 1)                    | 0 (0 to 1)                 | 0.967        |
| Contraception                          | 1 (6.7 %)                     | 2 (3.4 %)                  | 0.504        |
| Systolic blood pressure (mm Hg)        | 122.6 (17.9)                  | 122.2 (15.9)               | 0.932        |
| Diastolic blood pressure (mm Hg)       | 75.1 (11.6)                   | 76.7 (9.0)                 | 0.534        |
| Heart rate (bpm)                       | 69.6 (6.5)                    | 69.1 (9.8)                 | 0.853        |
| Urea (mmol/L)                          | 4.8 (1.1)                     | 5.6 (1.4)                  | 0.076        |
| Creatinine (μmol/L)                    | 62.8 (11.1)                   | 63.1 (8.2)                 | 0.893        |
| Sodium (mmol/L)                        | 142.4 (1.9)                   | 141.2 (1.9)                | <b>0.037</b> |
| Potassium (mmol/L)                     | 4.3 (0.3)                     | 4.4 (0.2)                  | 0.493        |
| Angiotensin-converting enzyme (ukat/L) | 0.7 (0.3 to 1.4)              | 0.7 (0.1 to 1.5)           | 0.987        |
| Lactate dehydrogenase (ukat/L)         | 2.8 (0.5)                     | 2.7 (0.5)                  | 0.411        |
| Aspartate amino transferase (ukat/L)   | 0.3 (0.1)                     | 0.3 (0.1)                  | 0.684        |
| Alanine amino transferase (ukat/L)     | 0.2 (0.1)                     | 0.3 (0.1)                  | 0.297        |
| Albumin (g/L)                          | 45.1 (3.0)                    | 46.1 (2.5)                 | 0.178        |
| Bilirubin (μmol/L)                     | 6.7 (2 to 12)                 | 9.0 (4 to 27)              | 0.078        |
| Gamma-glutamyltransferase (ukat/L)     | 0.3 (0.2 to 0.5)              | 0.3 (0.1 to 1.8)           | 0.838        |
| Alkaline phosphatase (ukat/L)          | 1.2 (0.7 to 1.6)              | 1.1 (0.6 to 2.0)           | 0.306        |
| Magnesium (mmol/L)                     | 0.9 (0.1)                     | 0.9 (0.1)                  | 0.647        |
| Urates (μmol/L)                        | 263.9 (46.1)                  | 246.1 (64.9)               | 0.337        |
| Ferritin (μg/L)                        | 82.4 (20.3 to 231.6)          | 102.9 (7.3 to 1151.1)      | 0.636        |
| Transferrin (μmol/L)                   | 31.1 (2.7)                    | 33.9 (9.5)                 | 0.271        |
| Transferrin saturation index (%)       | 22.4 (11 to 36)               | 28.9 (5 to 85)             | 0.101        |
| Haptoglobin (g/L)                      | 1.2 (0.4)                     | 1.2 (0.4)                  | 0.748        |
| Iron (μmol/L)                          | 14.0 (4.5)                    | 17.1 (6.9)                 | 0.123        |
| C-reactive protein (mg/L)              | 2.5 (0.3 to 18.1)             | 2.3 (0.3 to 43.6)          | 0.878        |
| Rheumatoid factor (ku.i./L)            | 13.5 (10 to 59)               | 14.6 (10 to 248)           | 0.896        |
| Protein/creatinine (g/mol)             | 9.2 (8.1 to 11.1)             | 8.6 (6.3 to 10.5)          | 0.269        |
| Vitamin D (nmol/L)                     | 77.6 (29.7 to 194.0)          | 67.3 (23.1 to 147.4)       | 0.253        |
| Parathormone (pmol/L)                  | 4.3 (2.9 to 6.9)              | 4.4 (3.1 to 5.7)           | 0.844        |

| Variable                              | Control without US<br>(n= 15) | Control with US<br>(n= 58) | <i>p</i>     |
|---------------------------------------|-------------------------------|----------------------------|--------------|
| Thyrotropin ( <i>mu.int./L</i> )      | 1.5 (0.9 to 1.9)              | 2.0 (1.4 to 2.8)           | 0.085        |
| Thyroxine ( <i>pmol/L</i> )           | 14.3 (13.7 to 16.1)           | 15.0 (13.9 to 16.8)        | 0.603        |
| Glycosylated hemoglobin (%)           | 5.6 (0.3)                     | 5.5 (0.9)                  | 0.675        |
| Homocysteine ( $\mu\text{mol/L}$ )    | 10.2 (5.0 to 24.0)            | 9.2 (4.0 to 17.0)          | 0.347        |
| Vitamin B12 ( <i>pmol/L</i> )         | 373 (306.0 to 444.5)          | 384.0 (286.7 to 455.0)     | 0.727        |
| Folic acid ( <i>nmol/L</i> )          | 25.1 (13.4)                   | 23.2 (8.3)                 | 0.519        |
| Immunoglobulin G ( <i>mg/L</i> )      | 10446.1 (1974.0)              | 11003.0 (3330.7)           | 0.553        |
| Immunoglobulin A ( <i>mg/L</i> )      | 2277.0 (742.8)                | 1910.8 (1019.9)            | 0.214        |
| Immunoglobulin M ( <i>mg/L</i> )      | 1164.0 (683.3)                | 1193.9 (517.8)             | 0.858        |
| C3 complement ( <i>mg/L</i> )         | 968.7 (345.3)                 | 1093.5 (222.7)             | 0.980        |
| C4 complement ( <i>mg/L</i> )         | 223.1 (61.3)                  | 236.6 (52.9)               | 0.408        |
| Hemoglobin ( <i>g/L</i> )             | 132.2 (8.6)                   | 135.1 (19.0)               | 0.586        |
| Platelets ( $\times 10^9/\text{L}$ )  | 259.6 (54.1)                  | 259.3 (53.8)               | 0.985        |
| Leukocytes ( $\times 10^9/\text{L}$ ) | 6.4 (1.6)                     | 6.0 (1.4)                  | 0.453        |
| Prothrombin time                      | 0.9 (0.9 to 1.0)              | 0.9 (0.9 to 1.0)           | 0.834        |
| Thromboplastin time                   | 1.0636 (0.07762)              | 1.0133 (0.08249)           | <b>0.043</b> |
| Fibrinogen ( <i>g/L</i> )             | 3.1 (2.7 to 3.7)              | 3.2 (2.9 to 3.8)           | 0.403        |
| Pathological D-dimer                  | 0 (0%)                        | 1 (1.8%)                   | < 0.999      |

Data are expressed as n (%) for qualitative variables and analyzed by chi<sup>2</sup> test or Fisher test; mean (standard deviation) for normally distributed quantitative variables and analyzed by analysis of variance (ANOVA); median (interquartile range) for non-normally distributed variables, and analyzed by nonparametric tests (Mann–Whitney U). Data highlighted in bold indicate *p* < 0.05. US: Ultrasound; GFR CKD-EPI: Glomerular Filtration Rate Chronic Kidney Disease Epidemiology Collaboration; HDL-C: high-density lipoprotein cholesterol; LDL-C: low-density lipoprotein cholesterol; Non-HDL-C: non-HDL-cholesterol.

**Table S2:** Baseline characteristics of both the SLE and control group.

| Variable                               | Control group<br>(n= 73) | SLE group<br>(n= 73) | <i>p</i> |
|----------------------------------------|--------------------------|----------------------|----------|
| Caucasian                              | 71 (97.3 %)              | 70 (95.9 %)          | > 0.999  |
| Family history of premature CAD        | 6 (8.2 %)                | 3 (4.1 %)            | 0.562    |
| Family history of non-premature CAD    | 13 (17.8 %)              | 15 (20.5 %)          |          |
| Family history of premature stroke     | 5 (6.8 %)                | 6 (8.2 %)            | 0.426    |
| Family history of non-premature stroke | 16 (21.9 %)              | 10 (13.7 %)          |          |
| Family history of thrombosis           | 3 (4.1 %)                | 1 (1.4 %)            | 0.620    |
| Family history of cancer               | 39 (53.4 %)              | 38 (52.1 %)          | 0.868    |
| Hyperuricemia                          | 1 (1.4 %)                | 1 (1.4 %)            | > 0.999  |
| Menarche ( <i>years</i> )              | 12.6 (1.7)               | 12.8 (1.6)           | 0.443    |
| Pregnancies ( <i>number</i> )          | 2 (0 to 3)               | 2 (1 to 3)           | 0.520    |
| Miscarriages ( <i>number</i> )         | 0 (0 to 1)               | 0 (0 to 1)           | 0.787    |

| Variable                                           | Control group<br>(n= 73) | SLE group<br>(n= 73)   | <i>p</i>          |
|----------------------------------------------------|--------------------------|------------------------|-------------------|
| Breastfeeding >2 months                            | 31 (42.5 %)              | 28 (38.4 %)            | 0.613             |
| Contraceptives                                     | 3 (4.1 %)                | 5 (6.8 %)              | 0.719             |
| Ezetimibe                                          | 0 (0.0 %)                | 3 (4.1 %)              | 0.245             |
| Systolic blood pressure ( <i>mm Hg</i> )           | 122.3 (16.2)             | 124.1 (17.6)           | 0.514             |
| Diastolic blood pressure ( <i>mm Hg</i> )          | 76.5 (9.5)               | 78.0 (8.7)             | 0.323             |
| Heart rate ( <i>lpm</i> )                          | 69.2 (9.2)               | 74.0 (11.3)            | <b>0.006</b>      |
| Sodium ( <i>mmol/L</i> )                           | 141 (140 to 143)         | 142 (140 to 143)       | 0.196             |
| Potassium ( <i>mmol/L</i> )                        | 4.4 (0.2)                | 4.3 (0.4)              | <b>0.033</b>      |
| Chlorine ( <i>mmol/L</i> )                         | 102.5 (3.6)              | 102.2 (2.4)            | 0.693             |
| Angiotensin-converting enzyme<br>( <i>ukat/L</i> ) | 0.7 (0.5 to 0.8)         | 0.6 (0.4 to 0.9)       | 0.809             |
| Creatine kinase ( <i>ukat/L</i> )                  | 1.3 (0.9 to 1.9)         | 1.3 (0.8 to 2.0)       | 0.441             |
| Lactate dehydrogenase ( <i>ukat/L</i> )            | 2.7 (2.4 to 3.1)         | 3.0 (2.6 to 3.5)       | <b>0.001</b>      |
| Aspartate amino transferase<br>( <i>ukat/L</i> )   | 0.3 (0.3 to 0.4)         | 0.3 (0.3 to 0.4)       | 0.126             |
| Alanine amino transferase<br>( <i>ukat/L</i> )     | 0.3 (0.2 to 0.3)         | 0.3 (0.2 to 0.3)       | 0.681             |
| Bilirubin ( <i>μmol/L</i> )                        | 8.0 (6.0 to 10.0)        | 6.0 (4.2 to 8.0)       | <b>0.002</b>      |
| Gamma-glutamyltransferase<br>( <i>ukat/L</i> )     | 0.26 (0.18 to 0.38)      | 0.32 (0.21 to 0.48)    | <b>0.028</b>      |
| Alkaline phosphatase ( <i>ukat/L</i> )             | 1.14 (0.9 to 1.3)        | 1.11 (0.9 to 1.3)      | 0.854             |
| HDL-C/Total cholesterol                            | 0.3 (0.1)                | 0.3 (0.1)              | 0.879             |
| Magnesium ( <i>mmol/L</i> )                        | 0.9 (0.8 to 0.9)         | 0.8 (0.8 to 0.9)       | <b>0.002</b>      |
| Urates ( <i>μmol/L</i> )                           | 248 (221 to 291)         | 285.5 (225 to 321)     | <b>0.016</b>      |
| Urea ( <i>mmol/L</i> )                             | 5.4 (1.3)                | 6.2 (2.0)              | <b>0.005</b>      |
| Calcium ( <i>mmol/L</i> )                          | 2.4 (0.1)                | 2.4 (0.1)              | 0.376             |
| Ferritin ( <i>μg/L</i> )                           | 59.0 (32.4 to 123.1)     | 48.1 (26.4 to 98.5)    | 0.207             |
| Transferrin ( <i>μmol/L</i> )                      | 31.6 (29.6 to 34.5)      | 31.4 (29.0 to 35.5)    | 0.505             |
| Transferrin saturation index (%)                   | 25 (21 to 33)            | 22 (16 to 27)          | <b>0.008</b>      |
| Haptoglobin                                        | 1.2 (0.9 to 1.5)         | 1.4 (1.0 to 1.9)       | <b>0.003</b>      |
| Iron ( <i>μmol/L</i> )                             | 16 (13 to 20)            | 13 (10 to 17)          | <b>0.003</b>      |
| Pathological rheumatoid factor                     | 8 (11.4 %)               | 12 (17.6 %)            | 0.300             |
| Protein/creatinine ( <i>g/mol</i> )                | 9.0 (6.8 to 10.6)        | 8.8 (0.3 to 18.8)      | 0.352             |
| Thyrotropin ( <i>mu.int./L</i> )                   | 1.7 (1.3 to 2.6)         | 1.9 (1.4 to 3.1)       | 0.192             |
| Thyroxine ( <i>pmol/L</i> )                        | 14.9 (13.9 to 16.5)      | 14.4 (12.4 to 16.5)    | 0.060             |
| Immunoglobulin G ( <i>mg/L</i> )                   | 10391 (8940 to 12600)    | 12800 (10250 to 15075) | <b>&lt; 0.001</b> |
| Immunoglobulin A ( <i>mg/L</i> )                   | 1781 (1350 to 2550)      | 2800 (1900 to 3587)    | <b>&lt; 0.001</b> |
| Immunoglobulin M ( <i>mg/L</i> )                   | 1020 (754 to 1480)       | 875 (527)              | 0.079             |
| C3 complement ( <i>mg/L</i> )                      | 1069.3 (253.2)           | 1045.5 (230.4)         | 0.555             |
| C4 complement ( <i>mg/L</i> )                      | 233.9 (54.4)             | 170.5 (83.2)           | <b>&lt; 0.001</b> |

| Variable                       | Control group<br>(n= 73) | SLE group<br>(n= 73) | <i>p</i>     |
|--------------------------------|--------------------------|----------------------|--------------|
| Hemoglobin (g/L)               | 136 (130 to 143)         | 131 (124 to 139)     | <b>0.006</b> |
| Platelets ( $\times 10^9/L$ )  | 259.4 (53.5)             | 237.1 (81.2)         | 0.053        |
| Leukocytes ( $\times 10^9/L$ ) | 6.0 (5.3 to 6.9)         | 5.8 (4.6 to 7.1)     | 0.295        |
| Prothrombin time               | 0.9 (0.9 to 1.0)         | 0.9 (0.9 to 1.0)     | 0.660        |
| Thromboplastin time            | 1.0 (0.9 to 1.1)         | 1.0 (0.9 to 1.2)     | 0.263        |
| Fibrinogen (g/L)               | 3.2 (2.9 to 3.8)         | 3.2 (2.7 to 3.7)     | 0.668        |
| Pathological D-dimer           | 1 (1.4 %)                | 7 (10.3 %)           | <b>0.033</b> |
| Minimum ABI                    | 1.1 (1.0 to 1.2)         | 1.1 (1.0 to 1.1)     | 0.880        |
| Maximum ABI                    | 1.2 (1.1 to 1.2)         | 1.1 (1.1 to 1.2)     | 0.333        |

Data are expressed as n (%) for qualitative variables and analyzed by chi<sup>2</sup> test or Fisher test; mean (standard deviation) for normally distributed quantitative variables and analyzed by analysis of variance (ANOVA); median (interquartile range) for non-normally distributed variables, and analyzed by nonparametric tests (Mann–Whitney U). Data highlighted in bold indicate *p* < 0.05. SLE: Systemic Lupus Erythematosus; CAD: coronary artery disease; HDL-C: high-density lipoprotein cholesterol; LDL-C: low-density lipoprotein cholesterol; Non-HDL-C: non-HDL-cholesterol; ABI: ankle brachial index.

**Table S3:** Statistical analysis of the genetic variants of the *ZPR1*, *APOA5* and *GCKR* genes with carotid plaque.

| Gene                       | Non-carotid plaque subjects<br>(n= 112) | Carotid plaque subjects<br>(n= 19) | <i>p</i> |
|----------------------------|-----------------------------------------|------------------------------------|----------|
| <i>ZPR1</i> (c.*724C>G) CC | 77 (68.8 %)                             | 15 (78.9 %)                        | NA       |
|                            | CG                                      | 4 (21.1 %)                         |          |
|                            | GG                                      | 0 (0 %)                            |          |
| <i>APOA5</i> (c.56C>G) CC  | 97 (86.6 %)                             | 17 (89.5 %)                        | NA       |
|                            | CG                                      | 2 (10.5 %)                         |          |
|                            | GG                                      | 0 (0 %)                            |          |
| <i>GCKR</i> (c.1337C>T) CC | 41 (36.6 %)                             | 4 (21.1 %)                         | 0.381    |
|                            | CT                                      | 10 (52.6 %)                        |          |
|                            | TT                                      | 5 (26.3 %)                         |          |

Data are expressed as n (%); NA: not statistically applicable.

**Table S4:** Multivariate analysis of the risk factors for carotid plaque, including insulin resistance, in both the SLE and control group.

| Variable                  | OR (95 % CI)             | <i>p</i>     |
|---------------------------|--------------------------|--------------|
| SLE                       | 1.677 (0.369 to 7.629)   | 0.503        |
| GCKR (c.1337C>T) TT       | Ref.                     |              |
| CC                        | 0.114 (0.016 to 0.831)   | <b>0.032</b> |
| CT                        | 0.731 (0.158 to 3.379)   | 0.688        |
| Triglycerides (mmol/L)    | 12.864 (1.987 to 83.292) | <b>0.007</b> |
| Hypertension              | 3.244 (0.781 to 13.478)  | 0.105        |
| Age                       | 1.057 (0.987 to 1.132)   | 0.111        |
| Insulin resistance        | 0.467 (0.061 to 3.597)   | 0.465        |
| Nagelkerke R <sup>2</sup> | 40.8 %                   |              |

SLE: systemic lupus erythematosus; OR: odds ratio; CI: confidence interval. Data highlighted in bold indicate  $p < 0.05$ .

**Table S5:** Multivariate analysis of the risk factors for carotid plaque, including insulin resistance but not triglycerides, in both the SLE and control group.

| Variable                  | OR (95 % CI)            | <i>p</i>     |
|---------------------------|-------------------------|--------------|
| SLE                       | 1.380 (0.320 to 5.942)  | 0.666        |
| GCKR (c.1337C>T) TT       | Ref.                    |              |
| CC                        | 0.190 (0.034 to 1.049)  | <b>0.057</b> |
| CT                        | 0.567 (0.135 to 2.386)  | 0.439        |
| Hypertension              | 5.484 (1.408 to 21.360) | 0.432        |
| Age                       | 1.025 (0.964 to 1.089)  | 0.432        |
| Insulin resistance        | 4.853 (1.452 to 16.220) | <b>0.010</b> |
| Nagelkerke R <sup>2</sup> | 30.8 %                  |              |

SLE: systemic lupus erythematosus; OR: odds ratio; CI: confidence interval. Data highlighted in bold indicate  $p < 0.05$ .

**Table S6:** Multivariate analysis of the risk factors for carotid plaque, including triglycerides and the glucose index, in both the SLE and control group.

| Variable                        | OR (95 % CI)              | <i>p</i>     |
|---------------------------------|---------------------------|--------------|
| SLE                             | 1.693 (0.373 to 7.680)    | 0.495        |
| GCKR (c.1337C>T) TT             | Ref.                      |              |
| CC                              | 0.170 (0.029 to 0.985)    | <b>0.048</b> |
| CT                              | 0.578 (0.133 to 2.522)    | 0.466        |
| Hypertension                    | 4.334 (1.099 to 17.084)   | <b>0.036</b> |
| Age                             | 1.032 (0.969 to 1.099)    | 0.331        |
| Triglycerides and glucose index | 41.024 (3.892 to 432.438) | <b>0.002</b> |
| Nagelkerke R <sup>2</sup>       | 35.9 %                    |              |

SLE: systemic lupus erythematosus; OR: odds ratio; CI: confidence interval. Data highlighted in bold indicate  $p < 0.05$ .

**Table S7:** Multivariate analysis of the risk factors for carotid plaque, including glucose, in both the SLE and control group.

| Variable                  | OR (95 % CI)            | <i>p</i>     |
|---------------------------|-------------------------|--------------|
| SLE                       | 1.637 (0.354 to 7.575)  | 0.528        |
| GCKR (c.1337C>T) TT       | Ref.                    |              |
| CC                        | 0.112 (0.016 to 0.811)  | <b>0.030</b> |
| CT                        | 0.651 (0.143 to 2.971)  | 0.579        |
| Triglycerides (mmol/L)    | 7.195 (2.159 to 23.981) | <b>0.001</b> |
| Glucose (mmol/L)          | 1.044 (0.745 to 1.465)  | 0.801        |
| Hypertension              | 3.655 (0.882 to 15.149) | 0.074        |
| Age                       | 1.049 (0.981 to 1.122)  | 0.163        |
| Nagelkerke R <sup>2</sup> | 40.3 %                  |              |

SLE: systemic lupus erythematosus; OR: odds ratio; CI: confidence interval. Data highlighted in bold indicate  $p < 0.05$ .

**Table S8:** Multivariate analysis of the risk factors for carotid plaque, including severity by the SLICC/SDI index, in both the SLE and control group.

| Variable                  | OR (95 % CI)            | <i>p</i>     |
|---------------------------|-------------------------|--------------|
| SLICC/SDI= 0              | 1.564 (0.318 to 7.685)  | 0.582        |
| SLICC/SDI≥ 1              | 1.633 (0.272 to 9.803)  | 0.592        |
| GCKR (c.1337C>T) TT       | Ref.                    |              |
| CC                        | 0.110 (0.015 to 0.821)  | <b>0.031</b> |
| CT                        | 0.665 (0.147 to 3.008)  | 0.597        |
| Triglycerides (mmol/L)    | 7.556 (2.399 to 23.794) | <b>0.001</b> |
| Hypertension              | 3.555 (0.853 to 14.822) | 0.082        |
| Age                       | 1.051 (0.983 to 1.123)  | 0.146        |
| Nagelkerke R <sup>2</sup> | 40.3 %                  |              |

SLE: systemic lupus erythematosus; OR: odds ratio; CI: confidence interval. SLICC/SDI: Systemic Lupus International Collaborating Clinics/ACR Damage Index. Data highlighted in bold indicate  $p < 0.05$ .

**Table S9:** Multivariate analysis of the risk factors for carotid plaque, including the cumulative dose of corticosteroids, in both the SLE and control group.

| Variable                  | OR (95 % CI)            | <i>p</i>          |
|---------------------------|-------------------------|-------------------|
| ADC from 0 to 17 g        | 2.442 (0.488 to 12.205) | 0.277             |
| ADC > 17 g                | 0.852 (0.139 to 5.234)  | 0.862             |
| GCKR (c.1337C>T) TT       | Ref.                    |                   |
| CC                        | 0.101 (0.013 to 0.754)  | <b>0.025</b>      |
| CT                        | 0.584 (0.122 to 2.79)   | 0.500             |
| Triglycerides (mmol/L)    | 9.553 (2.836 to 32.178) | <b>&lt; 0.001</b> |
| Hypertension              | 4.306 (0.990 to 18.726) | 0.052             |
| Age                       | 1.051 (0.982 to 1.125)  | 0.153             |
| Nagelkerke R <sup>2</sup> | 42.2 %                  |                   |

OR: odds ratio; CI: confidence interval. ADC: cumulative dose of corticosteroids. Data highlighted in bold indicate  $p < 0.05$ .



**Table S10:** Multivariate analysis of the risk factors for carotid plaque, including homocysteine, in both the SLE and control group.

| Variable                  | OR (95 % CI)            | <i>p</i>     |
|---------------------------|-------------------------|--------------|
| SLE                       | 1.332 (0.268 to 6.607)  | 0.726        |
| GCKR (c.1337C>T) TT       | Ref.                    |              |
| CC                        | 0.101 (0.014 to 0.748)  | <b>0.025</b> |
| CT                        | 0.570 (0.124 to 2.616)  | 0.470        |
| Triglycerides (mmol/L)    | 7.164 (2.239 to 22.926) | <b>0.001</b> |
| Hypertension              | 3.428 (0.809 to 14.520) | 0.094        |
| Age                       | 1.034 (0.965 to 1.109)  | 0.342        |
| Homocysteine              | 1.026 (0.889 to 1.183)  | 0.726        |
| Nagelkerke R <sup>2</sup> | 38.9 %                  |              |

SLE: systemic lupus erythematosus; OR: odds ratio; CI: confidence interval. Data highlighted in bold indicate  $p < 0.05$ .

**Table S11:** Multivariate analysis of the risk factors for carotid plaque, including the dietary questionnaire, in both the SLE and control group.

| Variable                      | OR (95 % CI)            | <i>p</i>     |
|-------------------------------|-------------------------|--------------|
| SLE                           | 1.608 (0.346 to 7.464)  | 0.544        |
| GCKR (c.1337C>T) TT           | Ref.                    |              |
| CC                            | 0.113 (0.015 to 0.827)  | <b>0.032</b> |
| CT                            | 0.677 (0.143 to 3.210)  | 0.624        |
| Triglycerides (mmol/L)        | 7.560 (2.397 to 23.844) | <b>0.001</b> |
| Hypertension                  | 3.563 (0.867 to 14.635) | 0.078        |
| Age                           | 1.050 (0.982 to 1.122)  | 0.156        |
| Dietary questionnaire (score) | 1.013 (0.750 to 1.367)  | 0.935        |
| Nagelkerke R <sup>2</sup>     | 39.9 %                  |              |

SLE: systemic lupus erythematosus; OR: odds ratio; CI: confidence interval. Data highlighted in bold indicate  $p < 0.05$ .

**Table S12:** Statistical analysis of the allelic variants of the *GCKR* gene and lipid profile adjusted for lipid-lowering drugs.

| Variable              | Allelic variant<br><i>GCKR</i><br>(c.1337C>T)<br>gene | Non LLT<br>(n= 105) | LLT<br>(n= 41) | <i>p</i><br>LLT   | <i>p</i><br><i>GCKR</i> gene | <i>p</i><br>interaction<br>(LLT and<br><i>GCKR</i> gene) |
|-----------------------|-------------------------------------------------------|---------------------|----------------|-------------------|------------------------------|----------------------------------------------------------|
| TC (mmol/L)           | CC                                                    | 5.2 (0.8)           | 5.1 (0.9)      | 0.056             | 0.267                        | 0.293                                                    |
|                       | CT                                                    | 5.2 (0.9)           | 4.5 (0.7)      |                   |                              |                                                          |
|                       | TT                                                    | 5.2 (1.3)           | 4.9 (0.5)      |                   |                              |                                                          |
| TG (mmol/L)           | CC                                                    | 1.0 (0.5)           | 1.6 (0.9)      | <b>&lt; 0.001</b> | <b>0.028</b>                 | 0.354                                                    |
|                       | CT                                                    | 0.9 (0.4)           | 1.2 (0.4)      |                   |                              |                                                          |
|                       | TT                                                    | 0.9 (0.5)           | 1.2 (0.4)      |                   |                              |                                                          |
| HDL-C<br>(mmol/L)     | CC                                                    | 1.6 (0.6)           | 1.6 (0.4)      | 0.216             | 0.393                        | 0.415                                                    |
|                       | CT                                                    | 1.8 (0.4)           | 1.8 (0.4)      |                   |                              |                                                          |
|                       | TT                                                    | 1.7 (0.5)           | 1.6 (0.3)      |                   |                              |                                                          |
| LDL-C<br>(mmol/L)     | CC                                                    | 3.1 (0.7)           | 2.7 (0.8)      | <b>0.004</b>      | 0.87                         | 0.182                                                    |
|                       | CT                                                    | 2.9 (0.6)           | 2.2 (0.5)      |                   |                              |                                                          |
|                       | TT                                                    | 2.9 (0.7)           | 2.7 (0.3)      |                   |                              |                                                          |
| Non-HDL-C<br>(mmol/L) | CC                                                    | 3.5 (0.8)           | 3.5 (1.0)      | 0.208             | 0.109                        | 0.145                                                    |
|                       | CT                                                    | 3.4 (0.8)           | 2.8 (0.6)      |                   |                              |                                                          |
|                       | TT                                                    | 3.3 (0.9)           | 3.3 (0.8)      |                   |                              |                                                          |
| Apo B (g/L)           | CC                                                    | 1.0 (0.2)           | 1.0 (0.3)      | 0.260             | 0.099                        | 0.178                                                    |
|                       | CT                                                    | 0.9 (0.2)           | 0.9 (0.1)      |                   |                              |                                                          |
|                       | TT                                                    | 1.0 (0.3)           | 0.9 (0.2)      |                   |                              |                                                          |

Data are expressed as mean (standard deviation) and analyzed by analysis of covariance (ANCOVA) and adjusted for lipid-lowering drugs. Data highlighted in bold indicate  $p < 0.05$ . LLT: Lipid-lowering treatment; TC: total cholesterol; TG: triglycerides; HDL-C: high-density lipoprotein cholesterol; LDL-C: low-density lipoprotein cholesterol; Non-HDL-C: non-HDL-cholesterol; Apo B: apolipoprotein B.

**Table S13:** Statistical analysis of the allelic variants of the *GCKR* gene and carotid plaque adjusted for lipid-lowering drugs.

| Variable                       | Allelic variant<br><i>GCKR</i><br>(c.1337C>T)<br>gene | Non LLT<br>(n= 105) | LLT<br>(n= 41) | <i>p</i><br>LLT | <i>p</i><br><i>GCKR</i> gene | <i>p</i><br>interaction<br>(LLT and<br><i>GCKR</i> gene) |
|--------------------------------|-------------------------------------------------------|---------------------|----------------|-----------------|------------------------------|----------------------------------------------------------|
| Carotid<br>plaque<br>(present) | CC                                                    | 0 (0 %)             | 4 (28.6 %)     | <b>0.044</b>    | 0.868                        | 0.754                                                    |
|                                | CT                                                    | 5 (10.9 %)          | 5 (33.3 %)     |                 |                              |                                                          |
|                                | TT                                                    | 1 (6.3 %)           | 4 (44.4 %)     |                 |                              |                                                          |

Data are expressed as n (%) and analyzed by multivariate logistic regression. Data highlighted in bold indicate  $p < 0.05$ . LLT: Lipid-lowering treatment.
